# Supplementary material for: Birth size and the pace of aging in men
Source: Research Square preprint supplement (doi:10.21203/rs.3.rs-2740868/v1), 2023-04-11
Supplement: Supplementary file 1 [file 1fe5ec98481d2153dd1ad90c.xlsx]

## Sheet: Arkusz1
AGE	BIRTH WEIGHT	PONDRAL INDEX	Preg week at birth	S-KLOTHO	DHEA	DHEA-S	TAC	hsCRP LOG	Adiposity	Cortisol	Testosterone	Smoking in the past	Sport	Alcohol	BW Classification	8 isoepiprostaglandine [pg/ml] I wizyta	RNA/DNA [pg/ml] I wizyta	PCs [ng/ml] I wizyta
34.0233	3000	2.01509	36	1286.83	12.4901	3.16792	1.31914	0.341126	23.66	324.02	546.8	NO	YES	Sometimes	Normal	199.889	11356	25.042
31.6222	3200	1.82216	39	1035.17	2.27863	3.35636	1.09578	0.688466	38.66	300.785	261.7	NO	YES	Rarely	SGA	240.684	16110.5	27.155
32.512	2900	2.18619	37	1100.17	16.9727	4.49428	1.22717	0.00258168	33.75	488.734	556.1	NO	NO	Often	Normal	201.395	12390	6.676
32.0493	3400	1.83592	38	938.5	17.1147	4.59729	1.83156	-0.829556	16.02	337.649	736.1	NO	YES	Rarely	SGA	284.952	16141.2	27.014
31.6194	3700	2.22389	39	1001.83	20.6052	5.48328	2.06806	-0.570307	27.15	387.214	552.7	NO	NO	Often	Normal	320.701	14680.6	25.183
38.2587	4150	2.49437	40	1015.17	8.07123	2.75041	1.47681	0.760985	29.2	345.857	268.2	NO	NO	Rarely	Normal	161.1	13884	125.113
37.6564	3500	2.10368	40	578.5	6.28022	4.9447	1.24031	0.40306	30.53	281.08	425.4	NO	NO	Sometimes	Normal	315.924	13717.6	30.746
33.7577	3350	2.25018	39	1313.5	8.62996	3.99733	1.73959	-0.339355	20.97	385.229	529.2	NO	NO	Sometimes	Normal	252.241	15126.9	37.859
30.6858	3200	2.41235	39	1461.83	12.9756	4.15843	1.72645	-0.233857	30.7	299.212	653.2	YES	YES	Rarely	Normal	233.348	9732.87	28.493
33.0048	2650	1.77999	36	1526.83	19.0368	4.63194	1.3717	0.380595	27.34	416.703	654	YES	NO	Rarely	SGA	351.908	10525.1	63.563
36.8104	4000	2.0501	41	1166.83	7.99201	4.133	2.21259	0.393574	34.66	185.125	319.6	NO	NO	Rarely	Normal	193.978	15444.6	21.169
31.0527	3750	2.25394	37	993.5	6.07921	3.2076	1.43739	-0.93327	27.1	262.636	395.6	NO	NO	Often	Normal	226.66	10473.2	29.338
34.0151	3300	2.34695	42	718.5	8.55291	5.39208	2.29142	-0.236329	24.77	339.903	196.9	YES	NO	Often	Normal	103.666	20128.3	28.915
33.0103	3100	2.20471	39	926.833	10.1347	4.17085	1.27973	-0.39636	32.76	335.894	236.7	NO	NO	Often	Normal	166.009	13854.7	22.296
35.54	3900	2.3441	41	1998.5	12.0952	6.27703	1.16148	-1.23026	11.63	400.306	771.7	NO	YES	Sometimes	Normal	265.346	8433.48	33.775
32.6078	2750	2.33746	39	1651.83	7.79435	4.96841	2.12061	0.0613416	25.81	331.431	532.6	NO	NO	Rarely	Normal	265.595	16571.3	19.338
35.2279	3600	2.71389	40	978.5	5.99736	3.80162	2.52792	0.273107	22.33	338.229	481.2	NO	YES	Sometimes	Normal	189.483	14465.9	23.704
31.2854	3350	2.25018	39	961.833	13.0846	4.39919	1.92353	0.0421897	31.42	302.822	593.5	NO	YES	Often	Normal	213.454	17111.5	26.31
35.5702	4130	2.11673	41	1428.5	7.58295	4.02878	2.81698	-0.326964	31.16	337.916	296.6	NO	NO	Often	Normal	186.136	12473.4	38.775
37.2539	3250	1.95342	38	1188.5	8.9434	3.83082	2.18631	-0.179485	26.89	350.042	457.4	YES	NO	Often	SGA	282.292	16089.7	39.69
32.9528	3680	2.09548	39	1065.17	11.9384	4.18366	2.52792	0.300598	28.23	305.199	372.4	NO	NO	Sometimes	Normal	248.483	7630.73	31.732
36.1862	3900	2.10591	39	770.167	18.9688	5.44975	2.3177	0.488246	23.92	399.79	407.2	YES	NO	Often	Normal	187.186	9211.59	28
37.1937	3850	2.445	41	868.5	3.93711	3.33602	2.69873	0.355002	29.8	317.428	213.6	YES	NO	Often	Normal	111.849	18994.9	24.901
30.2861	3050	2.29927	39	1261.83	5.54663	3.85473	1.21403	-0.140014	25.08	344.64	299.6	NO	YES	Sometimes	Normal	242.724	14385.5	46.732
42.4641	3700	1.99792	39	1270.17	3.65729	2.31662	2.71186	-0.238815	25.28	291.709	355.2	NO	YES	Sometimes	SGA	201.206	10767.4	4.831
35.0527	3950	2.02448	39	915.167	6.05855	3.70476	2.69873	-0.148031	29.24	212.495	256.5	NO	NO	Rarely	Normal	187.89	20948.2	35.394
38.0424	2940	1.58753	39	998.5	2.60275	3.04	1.47386	0.77682	25.47	386.46	441.5	NO	YES	Often	SGA	192.97	14675.1	30.183
33.7741	3750	2.02491	39	876.833	14.8056	5.55858	1.66667	-0.327997	35.47	417.244	239.1	NO	NO	Sometimes	Normal	199.296	19833	23.845
37.358	2700	1.53745	36	1125.17	9.5756	4.76774	1.52385	0.6698	30.66	377.772	431	NO	YES	Sometimes	SGA	232.502	12678.4	24.375
38.1465	3600	2.56031	39	1341.83	8.27401	3.68231	1.98086	0.151252	31.42	347.216	756.2	NO	YES	Sometimes	Normal	206.014	15233.1	24.375
32.7529	4750	1.99305	40	1188.5	10.4695	3.68842	1.86661	-0.731819	21.17	404.666	601.2	NO	NO	Often	SGA	201.631	12105.4	20.089
39.0116	3900	1.71821	38	751.833	15.4685	4.92222	1.54527	-1.17701	23.92	304.811	458.3	YES	NO	Rarely	SGA	272.702	18587.6	16.339
36.8323	2930	1.96807	39	1674.7	13.8638	3.44206	1.75236	-0.749812	10.89	418.822	632.1	NO	NO	Sometimes	SGA	181.89	11542.9	27.768
39.8193	3350	1.90757	38	1006.7	14.5333	4.77988	0.974007	-1.32474	19.69	342.6	650.3	NO	YES	Often	SGA	216.614	19496.3	20.089
36.7036	3100	1.9687	36	856.7	16.9569	4.56741	1.53813	0.128033	11.37	374.229	448.5	NO	YES	Often	SGA	307.764	12258.8	29.375
30.0862	3500	1.99298	40	559.7	3.81872	4.57528	1.75236	-0.151998	21.77	230.712	478	NO	NO	Sometimes	SGA	241.418	17258.2	17.768
29.8316	3550	2.02146	35	572.7	5.89827	3.75914	1.82376	-0.830249	17.28	334.884	544.6	NO	YES	Sometimes	Normal	257.044	12445.1	6.071
32.8871	3850	2.31405	38	1643.7	12.0721	3.87567	2.23079	0.1004	34.06	378.906	440	NO	YES	Sometimes	Normal	267.14	14929.8	24.732
38.9788	3450	2.07363	39	779.7	6.57282	3.44721	2.27364	0.184122	18.56	331.427	906.5	NO	NO	Sometimes	Normal	252.705	14860	24.464
39.3977	3400	2.04358	39	1399.7	10.6405	4.80105	2.53071	-1.97355	13.16	356.584	391.6	NO	NO	Rarely	Normal	196.42	13602.4	33.125
36.1396	3750	1.65212	37	695.7	13.0395	3.06783	1.91726	0.812421	20.46	379.958	316.7	NO	NO	Sometimes	Normal	126.897	11298.1	25.037
34.5626	4000	2.84479	38	849.7	8.29414	4.57393	1.87749	-0.604278	27.1	244.165	313	NO	YES	Sometimes	Normal	164.656	11629.7	25.87
30.4476	2900	1.94792	38	997.7	7.34219	4.5386	2.04322	-0.582595	18.44	300.352	380.1	NO	YES	Sometimes	SGA	156.583	10203.3	51.426
36.2765	2800	1.99135	39	1189.7	7.3475	2.39464	1.84434	0.125583	24.15	346.475	465.6	NO	NO	Sometimes	SGA	159.618	9425.5	23.093
34.9514	3500	2.35093	39	1380.7	10.4073	3.12307	2.01671	-0.848618	15.43	403.253	899.9	YES	NO	Sometimes	Normal	157.013	11871.9	27.537
36.6571	3450	2.45363	38	742.7	7.6415	3.97653	2.12941	0.143169	18.07	286.179	396.9	NO	NO	Rarely	Normal	160.349	14204.8	4.204
40.4764	3000	2.26157	39	1614.7	6.40336	4.08114	2.23548	-0.382725	16.52	272.18	1010	NO	NO	Sometimes	Normal	164.055	8179.31	34.389
36.4408	3250	2.45004	39	533.7	13.9204	4.9949	1.85097	-0.187673	17.26	363.89	450	NO	YES	Often	Normal	133.805	21087	21.981
33.4456	3380	1.82512	39	1386.7	7.64195	3.2296	2.18907	-0.404004	16.85	331.273	684.9	NO	YES	Rarely	SGA	155.87	14584.1	23.093
33.9083	3600	2.4181	40	812.7	11.0439	4.83767	2.34155	0.592053	21.39	394.001	465.7	NO	NO	Often	Normal	136.149	17776.2	27.352
39.655	4550	2.10648	39	1049.7	6.65349	3.11825	2.35481	-0.304237	28.63	331.291	353.2	NO	YES	Often	Normal	120.29	13361.7	26.333
30.6694	3000	1.70827	39	666.7	5.61263	4.88949	2.31504	-0.00681212	20.66	219.456	451.2	NO	YES	Rarely	SGA	149.802	11399.4	25.778
36.3285	3800	2.284	39	811.7	1.64556	2.00822	2.25537	-0.0958667	14.03	378.307	641.2	NO	YES	Sometimes	Normal	155.585	9957.86	28.648
32.5175	4300	1.80424	42	965.7	6.61731	3.10901	3.19676	0.273509	18.96	400.456	358.5	YES	NO	Sometimes	SGA	97.5287	11337.7	34.852
31.0363	3300	1.8791	37	306.7	8.50281	5.80592	1.63085	-0.155196	22.36	373.885	450.5	NO	YES	Often	SGA	213.291	15393.4	24.944
38.694	3200	2.27583	39	1251.7	7.14422	3.26928	1.72727	-0.913706	21.02	362.293	419.6	NO	NO	Rarely	Normal	201.737	10016.9	26.981
31.0472	4150	1.7413	39	1166.7	11.0962	5.13313	1.96832	-0.709032	11.13	328.259	785.7	NO	NO	Sometimes	SGA	199.916	8975.03	35.315
37.4182	3000	1.70827	39	789.7	14.6879	3.2146	1.63085	-0.0362874	12.02	387.261	902.6	YES	NO	Rarely	SGA	230.229	10906.4	72.412
37.1608	2750	2.2	39	540.7	7.39232	4.13678	1.54821	-0.21919	30.83	365.842	345.2	NO	YES	Rarely	Normal	283.243	12574.2	33.882
32.2464	4000	2.84479	37	766.7	6.12315	4.08095	1.96143	-0.0756281	19.57	252.45	811.5	NO	YES	Rarely	Normal	244.046	9268.78	27.926
32.4381	3600	2.28624	40	561.7	6.14814	4.13049	2.32645	0.0335879	10.34	323.309	526.2	NO	YES	Often	Normal	164.616	11834.5	33.956
30.3929	2750	1.95579	39	2306.5	15.3086	4.37127	2.19559	0.429924	26.37	433.187	474.4	NO	YES	Rarely	SGA	244.679	12169.6	18.956
31.4524	4350	1.91646	35	2354	6.95518	3.43926	2.62948	-0.175767	22.01	278.178	365.9	YES	YES	Rarely	SGA	253.387	12315.4	25.721
33.9959	4500	1.98254	39	1176.5	15.5346	4.53246	2.17493	0.286799	28.98	380.349	330.4	NO	YES	Sometimes	SGA	235.05	15121.8	25.132
30.6475	3580	2.40467	39	1356.5	11.0476	5.71416	2.42975	0.117909	24.41	324.935	566.9	NO	YES	Sometimes	Normal	236.577	17764.5	19.691
37.0842	3500	2.48919	39	2506.5	5.90143	5.42557	2.17493	0.186735	34.4	310.259	256.4	NO	NO	Sometimes	Normal	159.165	18230.3	24.691
33.2183	3600	2.4181	39	1309	6.16865	5.28605	2.46419	0.167686	20.01	340.284	455.9	NO	NO	Rarely	Normal	232.928	9527.54	27.118
33.8891	3200	2.27583	38	1706.5	10.7742	4.36945	2.38843	-1.28068	14.82	286.285	554	YES	YES	Often	Normal	166.331	11539.7	26.088
36.6078	3950	2.80923	39	1956.5	13.546	3.12439	2.31956	-0.595302	25.02	385.206	296.1	NO	NO	Rarely	Normal	172.473	13304.8	33.294
42.3491	3800	2.41325	38	1291.5	6.24297	4.55954	2.18871	0.597359	27.6	206.202	862.6	NO	NO	Rarely	Normal	297.147	6209.1	26.971
31.8795	4130	2.01092	41	1234	7.22734	4.68728	2.58815	0.631121	31.41	281.035	579.3	YES	NO	Often	Normal	182.588	20885.3	28.368
43.7481	3400	1.93604	40	869	5.03752	2.71559	2.31956	0.619854	23.04	221.941	586	NO	YES	Often	SGA	271.041	10247	24.103
36.3723	3650	2.0784	40	1306.5	9.05695	3.81058	1.62095	-1.63998	14.27	290.087	744.9	NO	YES	Rarely	Normal	249.907	10617.4	20.794
37.0075	3350	1.80892	35	1781.5	4.85308	4.40264	1.25481	-0.0414204	14.97	304.592	564.5	NO	NO	Rarely	SGA	253.986	12648.3	26.162
44.293	3500	2.48919	39	1846.5	1.5436	1.66231	1.5713	0.22486	22.86	288.672	581.9	NO	YES	Rarely	Normal	246.89	12274.6	30.5
32.9802	5000	2.20283	44	1206.5	5.58997	3.39751	1.72645	0.303931	36.81	374.344	483.8	NO	NO	Rarely	Normal	257.35	13924.3	49.25
39.0363	4000	2.2777	39	1596.5	1.81554	4.38279	1.9933	-0.447519	26.2	265.562	301.1	YES	YES	Sometimes	Normal	239.749	11105.9	47.74
30.9377	3200	1.82216	40	2384	15.0092	4.07988	2.08638	-0.726583	27.37	409.444	345.1	YES	YES	Sometimes	SGA	234.47	10438.8	31.712
30.3354	3950	1.92327	39	1499	11.8696	2.94421	1.9933	-0.319001	28	372.276	435.3	NO	YES	Sometimes	SGA	272.632	12159.2	45.822
31.6742	3100	1.76522	40	1796.5	24.3259	5.64417	1.96227	-1.48872	10.02	394.091	608.5	NO	YES	Often	SGA	201.854	13013.8	3.077
32.1342	3300	2.64	40	1651.5	9.42241	3.12474	2.17327	-0.128977	23.96	307.929	570	NO	YES	Rarely	Normal	226.999	11453.5	38.288
32.1889	3300	2.09572	40	1701.5	5.84547	3.71162	1.93124	0.0678765	28.46	343.732	438.6	YES	YES	Sometimes	Normal	254.243	10877.7	41.027
35.165	3350	2.25018	39	1589	12.6896	3.08175	1.95606	-1.46389	7.07	432.711	339.9	YES	NO	Rarely	Normal	237.335	10285.1	35.548
44.2601	3200	1.72793	39	1481.5	4.30368	3.03975	2.04294	-0.379353	19.97	302.856	466.5	NO	YES	Often	SGA	241.21	13450.6	21.164
33.5086	3850	2.73811	40	1384	15.6744	5.15084	2.26635	-1.91618	8.77	426.079	543.8	NO	YES	Sometimes	Normal	205.773	10156.2	38.767
37.7851	3650	2.75158	42	2036.5	6.22789	4.00577	2.20429	0.653659	42.33	358.819	210.8	YES	NO	Often	Normal	247.641	16816.5	40.205
37.8973	3550	2.02146	38	1586.5	8.1378	3.01673	2.28497	0.27768	25.41	341.11	466.9	NO	NO	Often	Normal	235.898	15981.1	24.315
37.0869	3620	2.17581	39	2286.5	3.87472	5.73997	2.05536	-0.314689	13.26	267.655	623	NO	YES	Sometimes	Normal	203.908	21890.5	36.096
36.8515	3680	1.79181	39	2274	3.81414	3.73453	2.2105	-0.501203	24.12	314.316	368.3	NO	YES	Sometimes	SGA	182.61	13007.9	39.863
35.0089	3200	2.03221	38	1849	6.33235	3.44984	2.06777	0.0434921	21.16	358.06	450	YES	NO	Sometimes	Normal	228.381	22585	41.849
37.2649	2970	1.44611	42	1709	5.13045	1.86668	2.19809	-1.44288	21.39	311.618	610.5	NO	NO	Rarely	SGA	230.471	20634.1	59.863
40.0055	3200	1.64008	40	2254	10.6029	3.53512	2.47114	-1.10638	11.67	310.774	626.7	NO	YES	Sometimes	SGA	225.624	12955.2	33.425
30.4203	3700	1.99792	39	1326.5	4.17879	4.4634	1.5006	0.19333	29.75	322.85	224.6	YES	YES	Sometimes	SGA	125.086	25917	34.567
38.1109	4000	2.2777	41	2434	5.58794	2.78256	1.34982	0.208974	14.05	280.428	726.1	NO	YES	Rarely	Normal	129.298	16875.9	32.695
38.0014	2900	2.18619	37	2686.5	3.03615	3.10635	1.43426	-1.21647	16.51	283.875	423.4	NO	YES	Rarely	Normal	112.099	13437.6	27.05
30.3628	3600	2.16379	40	919.5	7.3385	3.61222	1.39204	-0.180577	17.94	397.159	429.3	NO	YES	Sometimes	Normal	121.635	21602.3	35.41
38.3409	4240	2.17311	37	1117	2.91755	3.87458	1.4222	0.17019	18.95	239.592	848.6	NO	NO	Sometimes	Normal	143.999	17709.2	26.179
38.8665	3900	2.3441	39	1242	13.8758	4.39072	1.55489	0.131648	25.08	306.817	475.5	NO	YES	Sometimes	Normal	135.556	19674.4	32.397
31.3238	3200	2.03221	39	887	5.60174	3.55798	1.74789	-0.0641864	25.41	361.216	683.7	NO	YES	Often	Normal	118.871	17124.4	37.782
39.4031	3510	2.64604	39	989.5	18.301	5.361	1.72376	-0.260863	23.25	378.715	225.7	NO	NO	Often	Normal	173.444	16810	28.679
40.115	3500	2.6385	39	1034.5	2.63278	2.62336	1.60917	0.049573	20.39	227.557	416.9	NO	NO	Often	Normal	158.743	22107.7	34.256
30.9295	4000	2.0501	40.5	1022	5.10516	2.84777	1.10253	-0.248868	19.67	375.286	761.2	NO	NO	Rarely	Normal	116.805	31438.2	31.436
33.9028	3950	2.24923	41	1529.5	5.89964	4.35768	1.88058	-0.435409	29.05	240.916	327.6	NO	NO	Sometimes	Normal	123.57	30153.8	25.603
34.7543	3950	2.37415	38	734.5	9.2811	3.83398	1.75995	-0.953031	23.53	302.077	774.6	YES	YES	Often	Normal	137.211	23957.2	32.654
31.9726	3600	2.04993	39	1044.5	6.42209	4.51271	2.25452	0.402836	35.7	213.687	375.2	NO	YES	Sometimes	Normal	125.319	21364.9	29.705
34.5462	4300	1.80424	39	967	3.05697	4.26567	1.88661	0.59503	22.65	149.002	567.4	NO	YES	Sometimes	SGA	103.807	29652	36.821
37.514	3650	2.0784	38	1494.5	4.2475	3.38324	1.45235	0.183904	26.9	280.568	435.4	NO	YES	Sometimes	SGA	127.87	21521.4	34.385
31.1704	3500	1.88992	41	1387	9.54699	4.68074	2.09168	0.096206	24.54	300.184	380.3	NO	NO	Rarely	SGA	110.358	15419.8	33.744
35.091	3500	2.10368	36	1322	9.93406	3.3372	2.58022	0.389688	19.56	298.53	483.5	NO	NO	Often	Normal	106.265	17002.9	23.744
36.2053	3850	1.97323	39	1384.5	1.14907	1.91105	2.18215	0.103434	36.38	218.835	241.7	YES	NO	Rarely	SGA	115.678	21250.4	40.923
32.4517	3500	2.22273	39	1107	3.3199	3.32173	2.17612	0.208599	17.01	324.461	488.2	NO	NO	Sometimes	Normal	133.979	12543.7	30.731
35.8932	3850	2.445	40	872	10.4761	5.89201	1.8036	0.0770169	30.3	254.369	280	NO	NO	Often	Normal	318.125	18601.7	51.405
40.3258	3630	1.86047	35	877	3.96405	2.892	1.88123	0.0433067	16.48	297.284	433.7	NO	YES	Rarely	SGA	307.742	17444.9	15.013
38.2341	3800	2.284	41	1017	12.9112	3.98241	2.03002	0.0184333	14.53	369.393	556.1	NO	YES	Rarely	Normal	313.492	17236.5	62.987
31.4743	4330	2.3381	41	752	14.0761	2.19494	2.10118	-0.307217	8.62	342.268	1157	NO	YES	Sometimes	Normal	282.273	12605.8	42.734
36.7009	3850	2.19228	40	1964.5	9.28628	5.02842	2.23703	0.643732	26.48	201.4	381.9	NO	YES	Sometimes	Normal	332.784	20120.3	44.886
36.4298	3650	2.59587	39	1107	3.03197	3.04544	1.97826	0.197797	28.78	271.952	361.7	NO	NO	Sometimes	Normal	290.991	15090.1	48.241
35.0554	3000	2.4	39	922	3.72189	3.66261	2.28231	0.311193	23.48	296.355	383.4	YES	NO	Sometimes	Normal	335.967	21877.5	39.506
36.5339	3400	2.15922	40	1072	6.8278	4.25269	2.26291	-1.59307	12.55	344.506	523.6	NO	YES	Often	Normal	327.343	15802.6	49.949
30.5106	3900	1.99885	39	857	3.10722	2.67563	2.22409	0.596516	24.51	229.104	454.5	NO	NO	Sometimes	SGA	262.208	17184.5	41.595
43.384	3900	2.94005	39	857	7.20723	2.79721	2.17234	-0.0653028	15.15	276.53	494.9	NO	YES	Often	Normal	383.531	24769.7	9.316
43.7563	3600	2.28624	41	719.5	9.69448	4.156	2.4117	0.0445137	28.83	352.117	375.5	NO	YES	Sometimes	Normal	328.891	18666.1	9.19
29.9548	3200	2.03221	40	1474.5	9.23522	4.65935	2.28231	-1.15422	20.31	317.944	623	NO	YES	Rarely	Normal	279.559	25151.5	41.911
36.167	2950	1.7731	39	924.5	24.997	6.19621	2.30819	-0.291258	23.64	376.275	490.9	NO	YES	Sometimes	SGA	311.044	21461.7	46.722
34.5079	2900	2.46496	40	1049.5	5.3106	3.2369	2.347	0.310867	22.09	355.129	588.2	YES	NO	Often	Normal	284.298	22025	2.853
34.3682	3650	2.59587	40	1317.2	7.22306	3.23897	2.20468	-0.393886	13.21	314.632	766.6	NO	YES	Rarely	Normal	309.959	20331.6	50.962
32.4873	3530	2.37108	39	901.2	20.7135	4.19585	2.63165	-0.0433603	23.81	400.431	424.6	NO	YES	Often	Normal	268.841	37112.5	34.696
34.3847	2600	1.65117	37	805.2	11.2455	3.65016	2.32113	0.0254167	22.47	348.419	563	NO	NO	Often	SGA	248.265	30024	41.532
32.1506	3650	2.75158	38	719.2	13.1338	3.94316	1.75184	-0.414199	20.54	311.713	512.1	NO	YES	Sometimes	Normal	253.534	15296	38.051
36.5284	3600	2.88	36	589.2	9.13255	4.52877	2.37288	-0.483579	17.33	269.918	321.4	NO	NO	Sometimes	Normal	269.114	12206.2	38.557
33.5359	3650	2.0784	37	985.2	15.4412	5.68952	2.44404	-0.793649	21.15	387.891	743.2	NO	YES	Sometimes	Normal	281.385	20911.1	46.342
34.3491	3450	2.76	39	781.2	11.0195	5.1109	2.13352	-0.51085	21.32	323.823	555	NO	YES	Often	Normal	220.008	19261.5	46.405
37.9685	3800	2.16381	40	843.2	7.02587	3.26835	2.36641	-0.70733	18.61	248.992	304.3	NO	NO	Sometimes	Normal	316.68	12835	124.633
31.885	3400	2.04358	39	639.2	12.6736	4.88345	2.38582	0.0753359	10.46	334.976	604.4	NO	YES	Rarely	Normal	331.283	11296.8	44.127
35.4689	3450	2.07363	41	627.2	6.59361	3.41571	2.10765	0.395959	21.47	289.557	697	YES	NO	Sometimes	Normal	286.865	22962.6	41.595
32.9281	4200	2.39158	41	555.2	6.90605	3.71712	2.00414	-0.19242	28.59	247.358	146.9	NO	YES	Sometimes	Normal	287.603	21330.8	51.405
39.1239	3500	1.99298	39	1243.2	1.32003	2.34868	1.82755	0.288762	24.34	179.216	320.9	NO	NO	Sometimes	SGA	151.187	14764.1	31.391
31.9014	3250	1.95342	39	639.2	20.5443	4.96569	1.65183	-0.196871	31.07	324.645	343.9	NO	NO	Sometimes	SGA	154.049	14467.6	29
35.3128	3100	2.08226	36	527.2	6.86976	3.84388	1.8217	-0.501601	23.3	361.113	631.3	NO	YES	Sometimes	Normal	123.998	23023.6	35.884
31.8905	3250	2.06396	37	1029.2	4.43814	4.35145	1.88027	-0.0491088	29.03	280.635	638.2	NO	YES	Often	Normal	128.576	30379.9	31.826
31.4552	3200	2.03221	39	1143.2	7.07531	4.28026	2.17901	0.390303	28.92	297.367	777	NO	YES	Often	Normal	172.99	17372.8	36.681
31.6879	3450	1.96451	41	1035.2	14.572	5.17944	2.00914	-0.818608	22.31	333.319	998.9	NO	YES	Often	SGA	142.491	22309.3	33.203
35.1211	3700	2.22389	39	1223.2	13.4503	4.30533	1.83341	-0.46977	22.07	194.716	326.5	NO	YES	Sometimes	Normal	153.768	20970.2	28.348
34.6119	2950	2.36	35	413.2	6.51023	4.6375	1.97399	-1.05086	18.96	209.019	343.4	YES	YES	Often	Normal	139.47	20806.6	34.58
33.462	3750	2.25394	40.5	947.2	11.4524	3.71726	2.14386	-0.22761	18.78	361.936	356.1	NO	YES	Sometimes	Normal	111.225	17908.9	31.536
39.5866	3100	2.33696	38	587.2	7.49501	6.02668	2.015	-0.689832	26.08	288.199	294	NO	NO	Sometimes	Normal	161.796	26661.5	30.812
40.3915	4000	2.0501	39	1669.2	9.87701	3.86046	1.92127	-0.125329	29.21	265.792	417.9	NO	YES	Often	Normal	147.016	24123.5	33.275
37.1362	2800	1.59439	42	873.2	6.17119	3.91339	2.16143	0.0620699	18.01	222.569	446	NO	YES	Rarely	SGA	164.775	14213.6	34.362
39.7153	2650	1.68292	39	631.2	11.3544	5.91799	2.097	-0.0730594	23.57	406.569	529	NO	NO	Often	SGA	138.816	23855.3	32.478
30.7844	4000	2.2777	39	1007.2	18.1227	4.91931	1.99157	-0.210382	21.1	418.446	377	NO	NO	Sometimes	Normal	156.285	22817.7	48.638
34.0561	3800	2.16381	41	547.2	10.7023	2.99292	2.33716	-0.168165	18.47	382.815	477	NO	NO	Sometimes	Normal	148.579	14887.9	8.13
36.6188	3150	2.11584	39	931.2	5.87391	2.79992	2.22587	0.48443	26.59	316.23	339	YES	YES	Sometimes	Normal	152.759	24187.7	31.609
36.783	3500	2.22273	36	811.2	9.61599	5.25841	1.89199	0.0424674	18.12	406.569	681	NO	YES	Sometimes	Normal	143.429	37793.6	34.435
40.4244	3100	2.08226	39	811.2	12.1485	2.5335	1.92127	0.18667	27.93	335.853	439	YES	NO	Often	Normal	149.451	28672.2	4.507
35.0472	3800	2.05191	41	595.2	18.4835	5.16367	2.4426	-0.540441	21.46	401.283	283	NO	YES	Sometimes	Normal	122.072	24612.2	26.464
33.2813	2750	1.74643	37	679.2	9.24419	0.94063	1.68112	-1.35675	25.97	312.937	445	NO	YES	Sometimes	SGA	123.651	33437.7	37.551
38.8118	3200	1.82216	39	779.2	11.3225	5.19506	2.36059	-0.789617	16.36	376.849	695	NO	YES	Often	SGA	138.098	28065.4	30.522
41.2402	3850	2.73811	39	791.2	2.14293	3.002	2.2493	0.411488	35.28	294.653	362	NO	NO	Often	Normal	113.769	35635.5	44.797
30.9405	3300	2.21659	38	855.2	4.5844	4.07679	1.95056	-0.0181951	25.04	313.757	540	NO	NO	Sometimes	Normal	133.481	21196.2	36.826
